# Supplementary material for: High-yield production of aromatics over CuFeO2/hierarchical HZSM-5 via CO2 Fischer–Tropsch synthesis
Source: Royal Society of Chemistry journal article supplement (doi:10.1039/d2gc04896e), 2023-01-01
Supplement: d2gc04896e1.pdf [file d2gc04896e1.pdf]

## Supporting information

### High-yield Production of aromatics over CuFeO<sub>2</sub>/hierarchical HZSM-5 via CO<sub>2</sub>

#### Fischer-Tropsch Synthesis

Yang Cheng<sup>a,#</sup>, Yong Chen<sup>a,#</sup>, Shuxian Zhang<sup>b</sup>, Xiaoting Wu<sup>a</sup>, Chide Chen<sup>a</sup>, Xin Shi<sup>a</sup>,

Ming Qing<sup>b</sup>, Jifan Li<sup>a,\*</sup>, Chun-Ling Liu<sup>a</sup>, Wen-Sheng Dong<sup>a,\*</sup>

*<sup>a</sup>Key Laboratory of Applied Surface and Colloid Chemistry (SNNU), MOE, School of Chemistry and Chemical Engineering, Shaanxi Normal University, Xi'an 710062, Shaanxi, China*

*<sup>b</sup>Synfuels China Co., Ltd., Beijing, 101407, PR China*

# Yang Cheng and Yong Chen are co-first authors of this article

\*Corresponding authors. E-mail: [lijifan@snnu.edu.cn](mailto:lijifan@snnu.edu.cn) (Jifan Li), [wsdong@snnu.edu.cn](mailto:wsdong@snnu.edu.cn) (Wen-Sheng Dong).

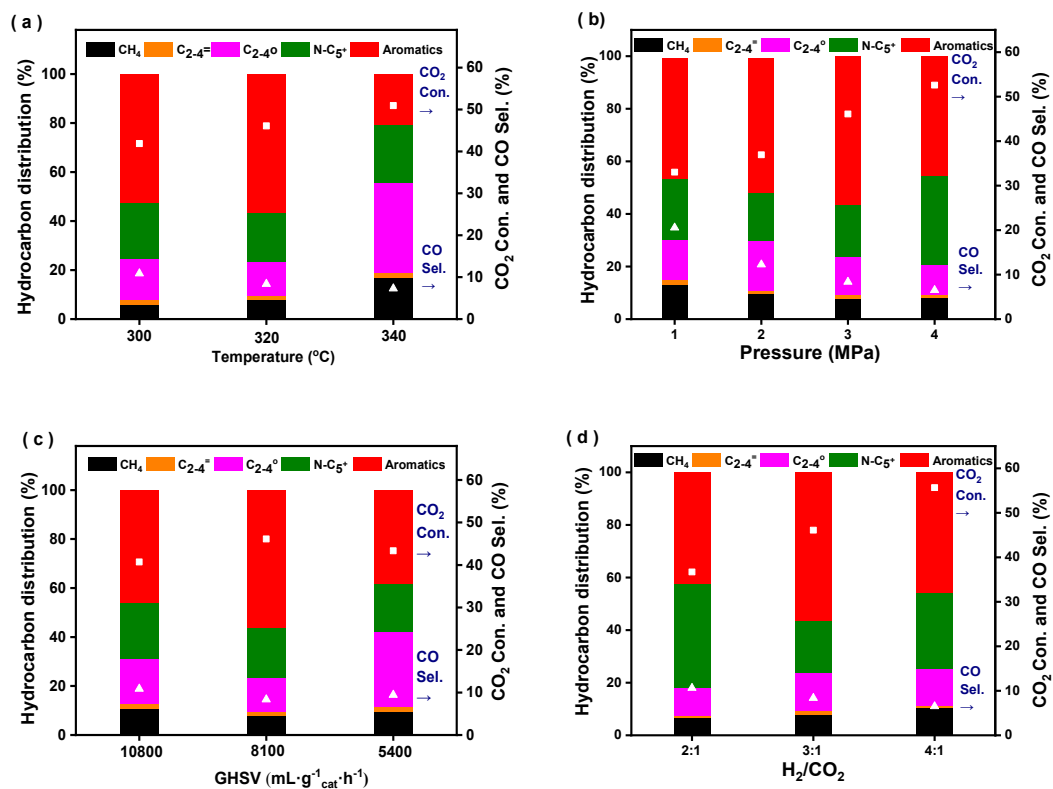

**Fig. S1.** The effects of reaction temperature (a), pressure (b), space velocity (c) and H<sub>2</sub>/CO<sub>2</sub> ratio (d) on the catalytic performance over CuFeO<sub>2</sub>/HZSM-5(25).

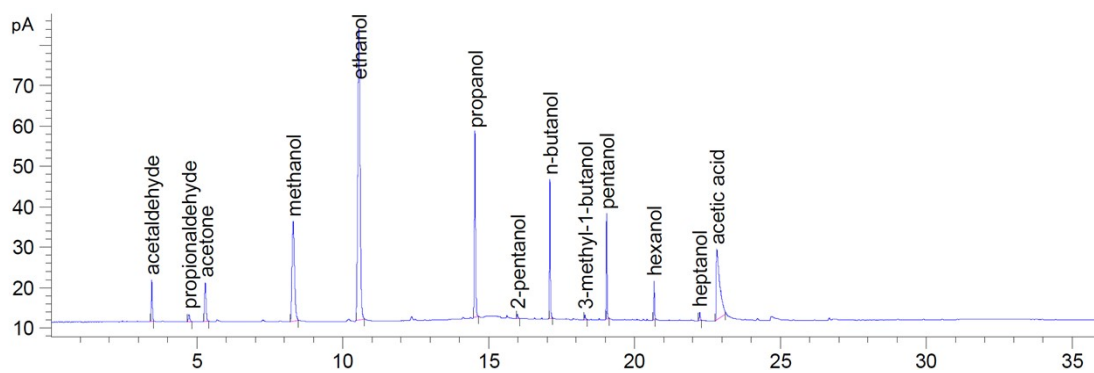

**Fig. S2** Species in water phase obtained over CuFeO<sub>2</sub>.

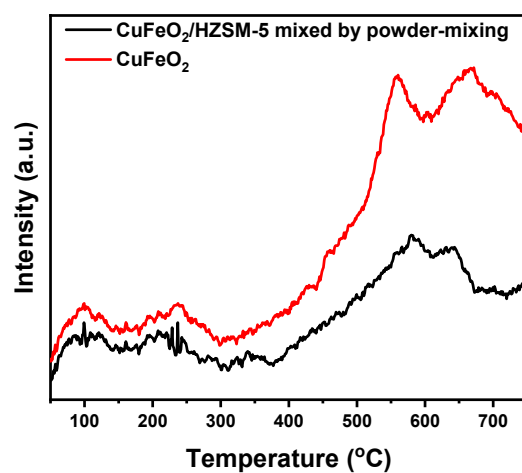

**Fig. S3** The CO<sub>2</sub>-TPD profiles of CuFeO<sub>2</sub> and CuFeO<sub>2</sub>/HZSM-5(25) mixed by powder-mixing.

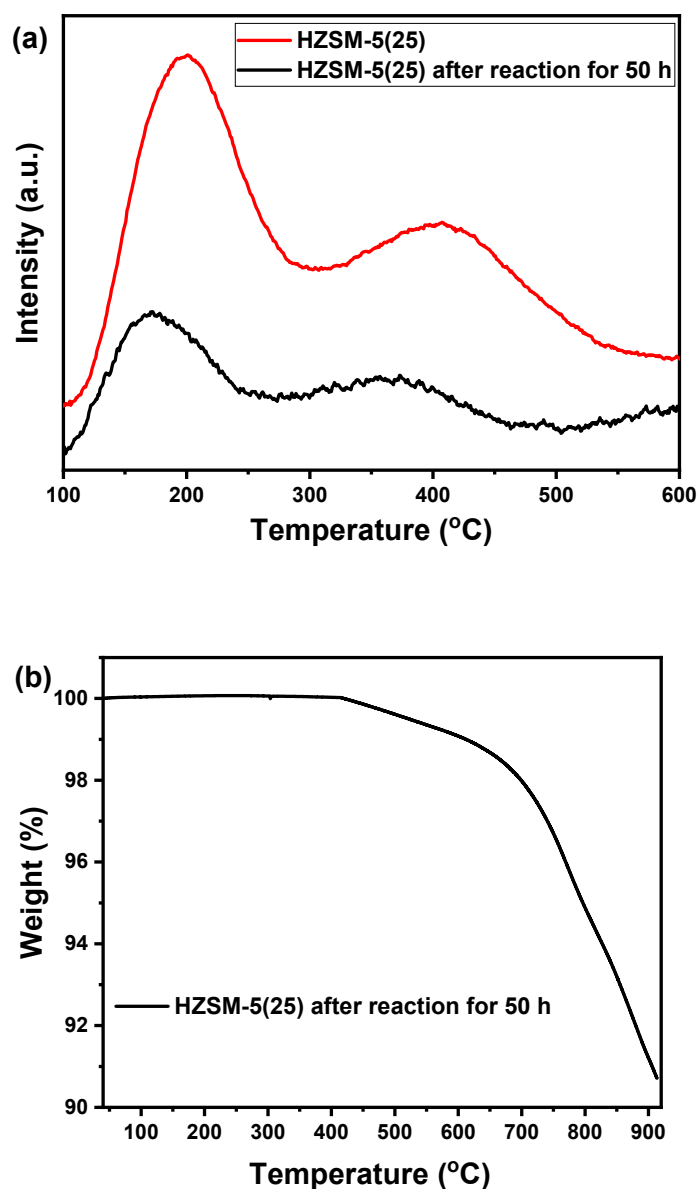

**Fig. S4** The NH<sub>3</sub>-TPD (a) and TGA (b) profiles of HZSM-5(25) after reaction for 50 h. (The carbon deposition on the spent HZSM-5(25) was determined by thermogravimetric analysis (TGA, HCT-4, China). Prior to the analysis, the spent sample was heat-treated under N<sub>2</sub> flow at a rate of 50 mL/min at 200 °C for 30 min in the TGA chamber. After the temperature of the TGA chamber decreased to 40 °C using a circulator, the TGA profiles were collected with increasing temperature till 900 °C at a heating rate of 5 °C/min under O<sub>2</sub> flow at a rate of 50 mL/min.)

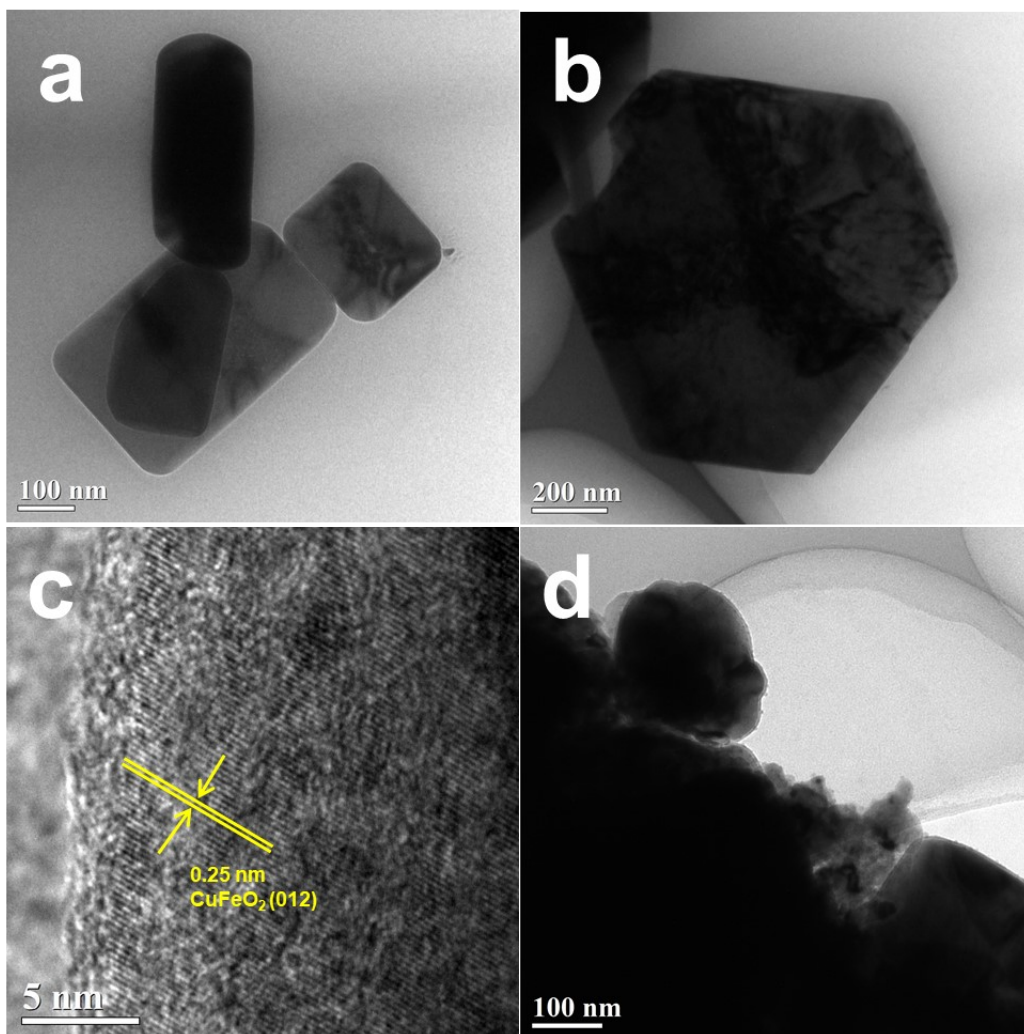

**Fig. S5.** TEM images (a-b) and HR-TEM image (c) of the fresh  $\text{CuFeO}_2$ , TEM image of the spent  $\text{CuFeO}_2$  (d).

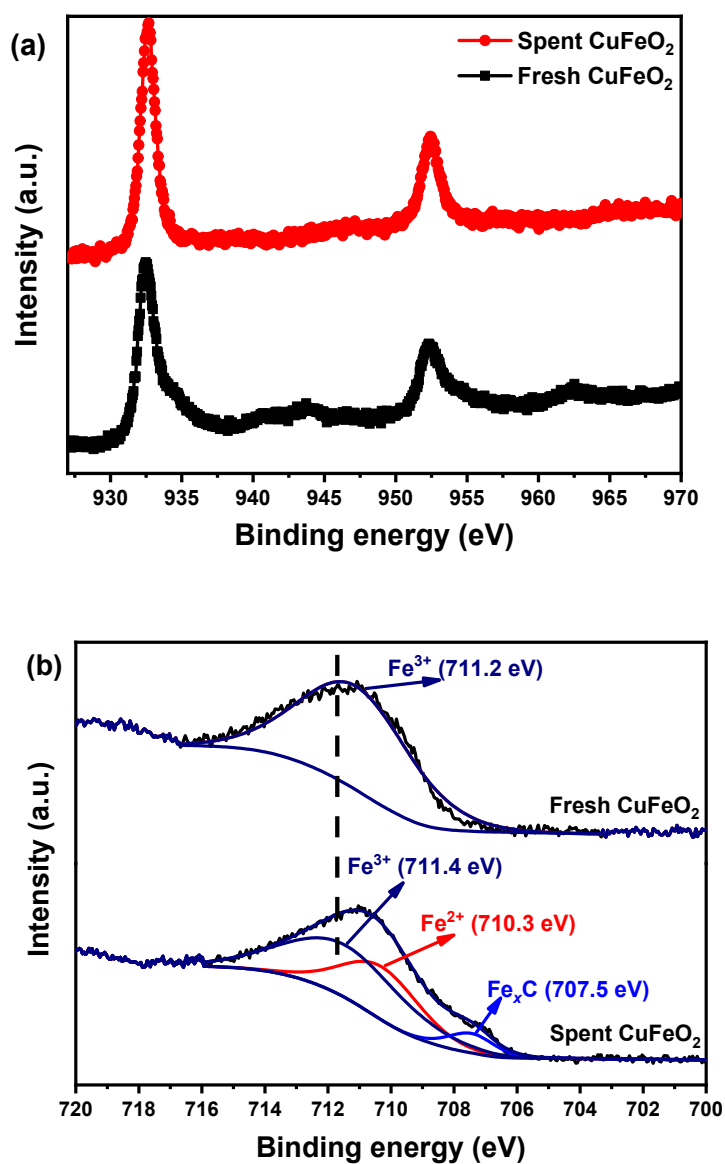

**Fig. S6.** Cu<sub>2p</sub> (a) and Fe<sub>2p<sub>3/2</sub></sub> (b) XPS spectra of the fresh and spent CuFeO<sub>2</sub>.

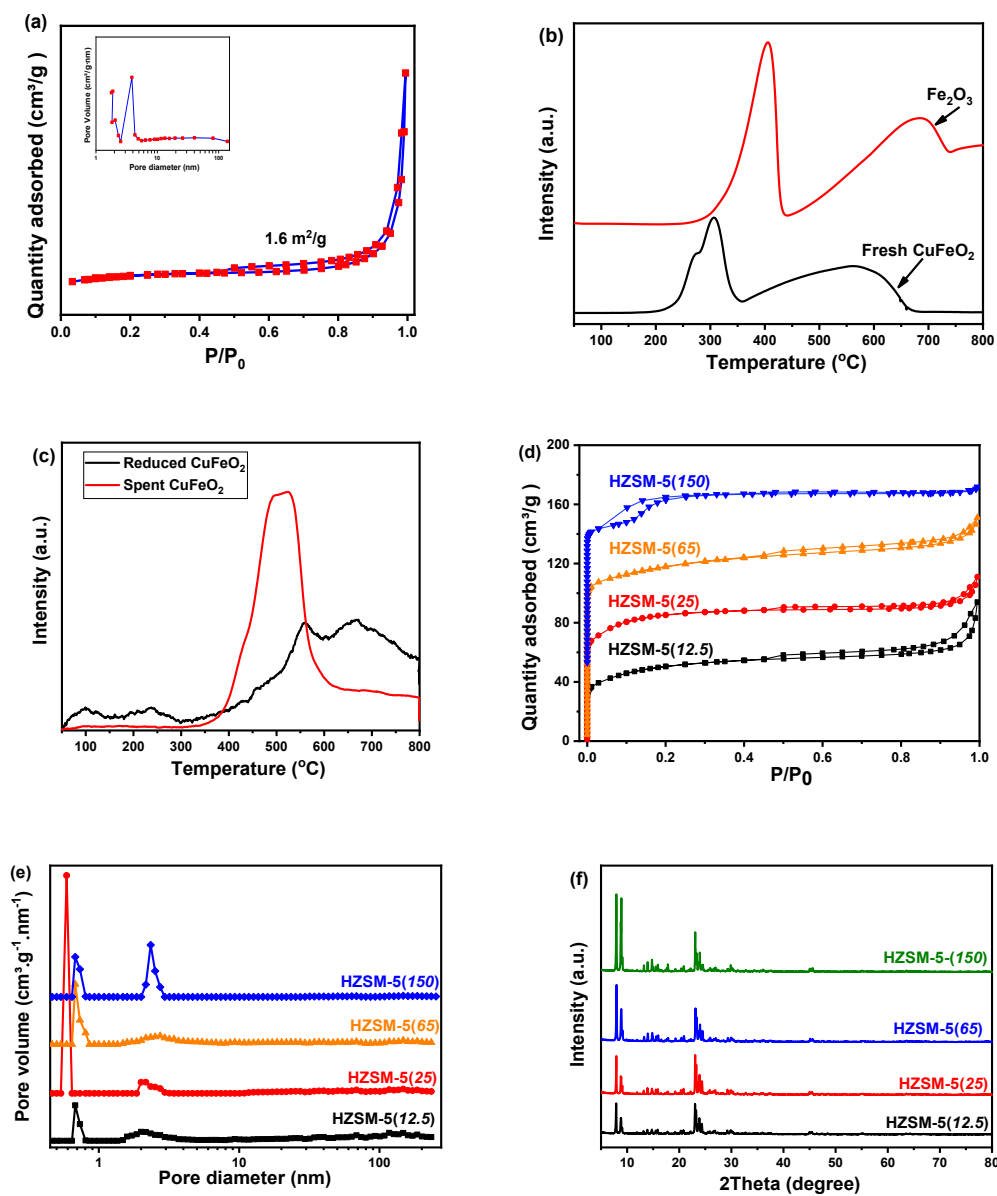

**Fig. S7.** N<sub>2</sub> adsorption-desorption isotherms and pore distribution of the fresh-CuFeO<sub>2</sub> (a), H<sub>2</sub>-TPR profiles (b), CO<sub>2</sub>-TPD profiles of the reduced and spent CuFeO<sub>2</sub>, N<sub>2</sub> adsorption-desorption isotherms (d), pore distribution (e), and XRD patterns (f) of HZSM-5 with different Si/Al ratios.



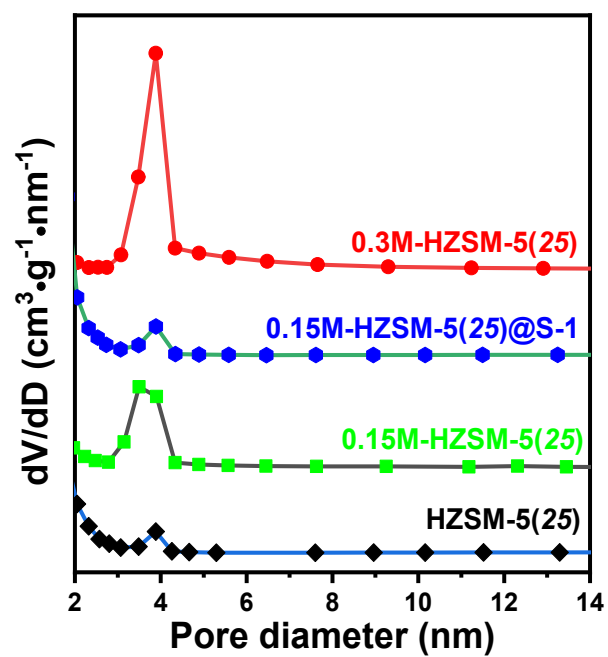

Fig. S8. Pore size distribution of different post treated HZSM-5(25)

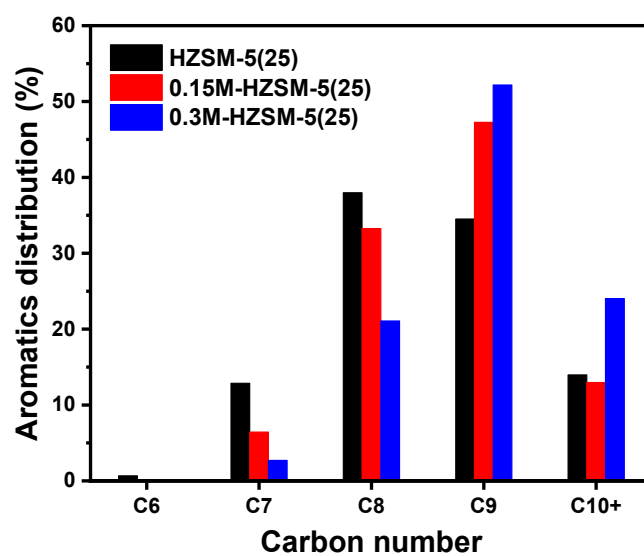

**Fig. S9.** Aromatics distribution of  $\text{CuFeO}_2$  coupled with HZSM-5(25), 0.15M-HZSM-5(25) and 0.3M-HZSM-5(25). Reaction conditions: 320 °C, 3 MPa,  $\text{H}_2/\text{CO}_2 = 3$ , GHSV = 8100  $\text{mL}\cdot\text{gcat}^{-1}\cdot\text{h}^{-1}$  (The tabs of HZSM-5 represent the bifunctional catalysts of  $\text{CuFeO}_2$  coupled with corresponding HZSM-5 in this figure).

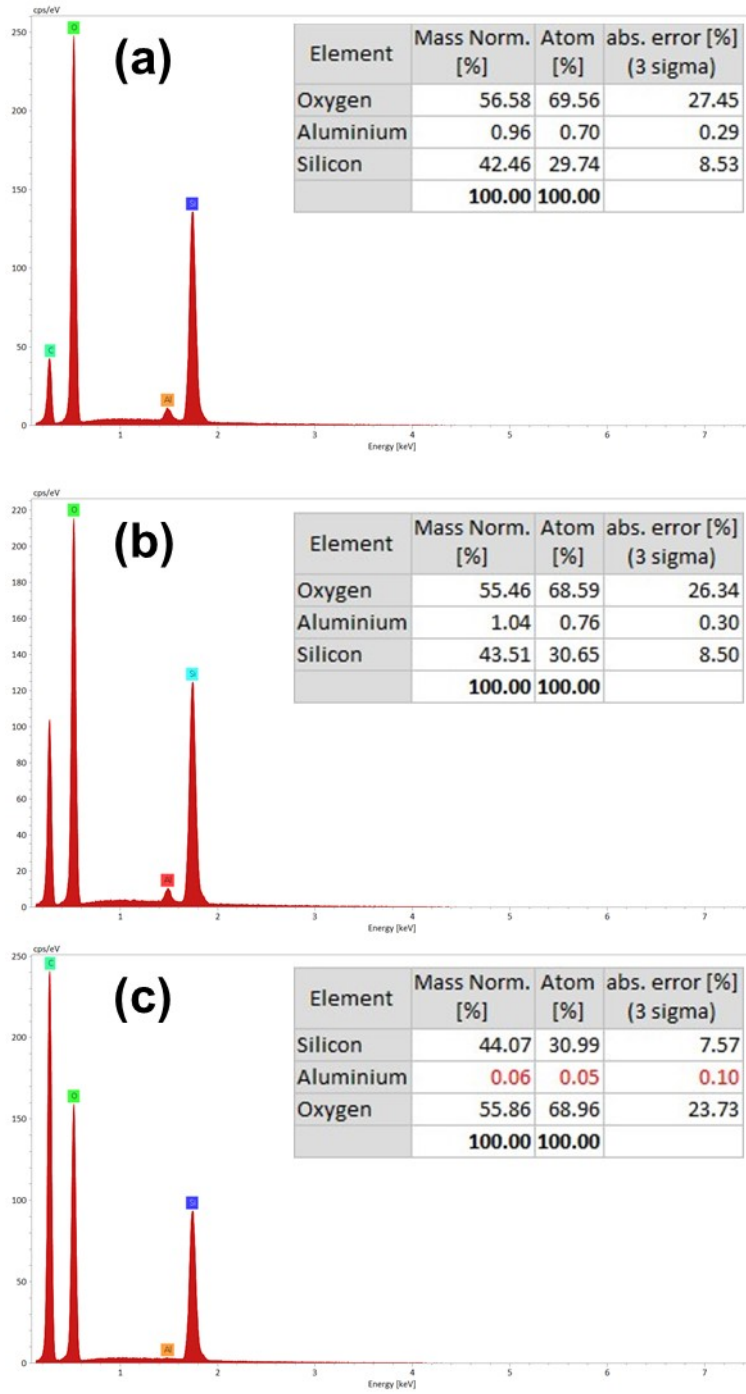

**Fig. S10.** Quantitative element analysis detected by EDS

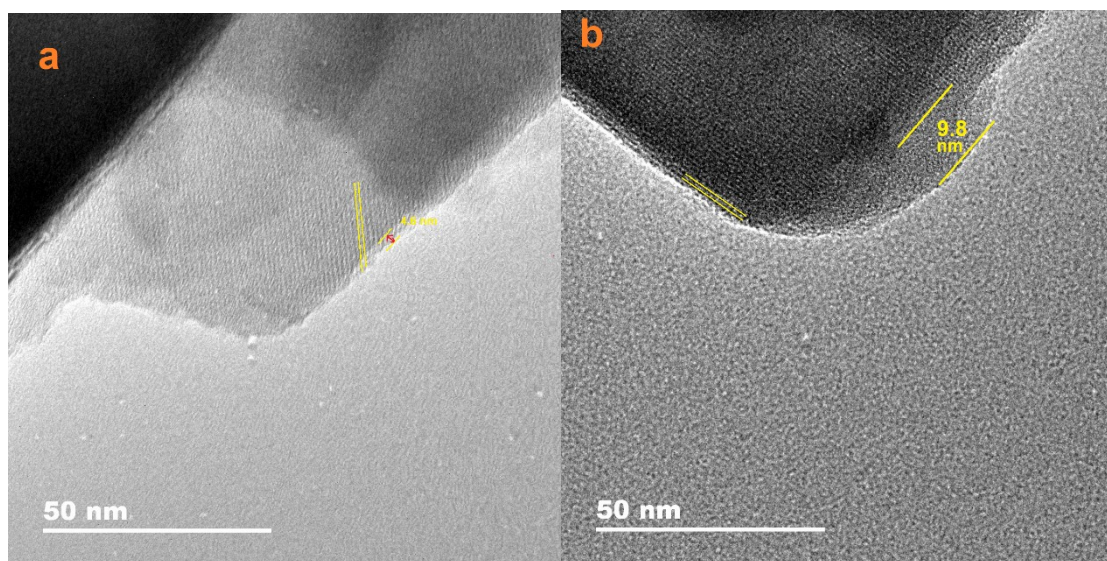

**Fig. S11** The HRTEM images of the 0.15M-HZMS-5(25)@S-1.

**Table S1** Comparison of catalytic performance

| Entry Catalysts                                         | Reaction conditions             |        |         |       | CO <sub>2</sub> conv. (%) | CO sel. (%) | Hydrocarbon distribution (%) |                                |                           |      |         | Ref.      |
|---------------------------------------------------------|---------------------------------|--------|---------|-------|---------------------------|-------------|------------------------------|--------------------------------|---------------------------|------|---------|-----------|
|                                                         | H <sub>2</sub> /CO <sub>2</sub> | T (°C) | P (MPa) | GHSV  |                           |             | CH <sub>4</sub>              | C <sub>2</sub> -C <sub>4</sub> | C <sub>5+</sub> aliphatic | Aro. | Aro.STY |           |
| ZnZrO/HZSM-5                                            | 3                               | 320    | 4       | 1200  | 14.1                      | 44.0        | 0.4                          | 19.6                           | 7.0                       | 73.0 | 10.6    | 1         |
| ZnO-ZrO <sub>2</sub> /HZSM-5(300)                       | 3                               | 340    | 3       | 2700  | 9.1                       | 42.5        | 0.6                          |                                |                           | 70.0 | 16.1    | 2         |
| ZnZrO <sub>x</sub> /HZSM-5                              | 3                               | 315    | 3       | 1020  | 17.5                      | 23.8        | 1.2                          | 29.8                           | 7.7                       | 60.3 | 12.6    | 3         |
| ZnAlO <sub>x</sub> /Si-HZSM-5                           | 3                               | 320    | 3       | 6000  | 5.0                       | 47.0        | 1.0                          | 29.5                           | 2.5                       | 67.0 | 16.6    | 4         |
| Cr <sub>2</sub> O <sub>3</sub> /ZnZSM-5@Si-1            | 2.7                             | 350    | 3       | 1200  | 22.1                      | 35.1        | 4.5                          | 22.6                           | 2.8                       | 70.1 | 18.9    | 5         |
| ZnCr <sub>2</sub> O <sub>4</sub> /HZSM-5                | 3                               | 350    | 4       | 1200  | 23.1                      | 27.8        | 0.5                          | 12.3                           | 1.8                       | 85.3 | 26.7    | 6         |
| ae-Zn-ZrO <sub>2</sub> /HZSM-5                          | 3                               | 340    | 4       | 2400  | 15.9                      | 34          | 0.3                          | 19.4                           | 4.3                       | 76.0 | 29.9    | 7         |
| 6.25Cu-Fe <sub>2</sub> O <sub>3</sub> /HZSM-5-pt        | 3                               | 320    | 3       | 1000  | 55.4                      | 4.4         | 12.5                         | 9.4                            | 15.4                      | 61.9 | 51.2    | 8         |
| Fe <sub>2</sub> O <sub>3</sub> @KO <sub>2</sub> /ZSM-5  | 3                               | 375    | 3       | 5000  | 48.9                      | 12.8        | 13.9                         | 45.9                           | 15.3                      | 24.9 | 82.9    | 9         |
| ZnFeO <sub>x</sub> -4.25Na/S-ZSM-5-Si                   | 3                               | 320    | 3       | 4000  | 36.9                      | 11.1        | 9.7                          | 27.7                           | 21.6                      | 41.0 | 83.9    | 10        |
| Na-Fe <sub>3</sub> O <sub>4</sub> /HZSM-5(25)-Si-1x12%  | 2                               | 320    | 3       | 4000  | 28.5                      | 15          | 6.2                          | 32.7                           | 18.1                      | 43.0 | 86.9    | 11        |
| Na-FeAlO <sub>x</sub> /Zn-HZSM-5(12.5)@SiO <sub>2</sub> | 3                               | 370    | 3       | 4000  | 45.2                      | 15.3        | 13.8                         | 26.2                           | 21.3                      | 38.7 | 92.6    | 12        |
| Na-Fe@C/0.2M-HZSM-5                                     | 3                               | 320    | 3       | 9000  | 33.3                      | 13.3        | 4.8                          | 10.4                           | 34.6                      | 50.2 | 203.7   | 13        |
| 1.5KFe/HSG&HZSM-5(50)                                   | 3                               | 340    | 2       | 26000 | 35.0                      | 39.0        | 3.5                          | 4.4                            | 24.0                      | 68.0 | 589.8   | 14        |
| CuFeO <sub>2</sub> /0.15M-HZSM-5(25)                    | 3                               | 320    | 3       | 8100  | 52.8                      | 7.3         | 4.1                          | 14.1                           | 13.4                      | 69.7 | 431.8   | this work |

1 Z. Li, Y. Qu, J. Wang, H. Liu, M. Li, S. Miao, C. Li, *Joule*, 2019, **3**, 570-583.

2 X. Zhang, A. Zhang, X. Jiang, J. Zhu, J. Liu, J. Li, G. Zhang, C. Song, X. Guo, *J. CO<sub>2</sub> Util.*, 2019, **29**, 140-145.

3 T. Wang, C. Yang, P. Gao, S. Zhou, S. Li, H. Wang, Y. Sun, *Appl. Catal. B-Environ.*, 2021, **286**, 119929.

4 Y. Ni, Z. Chen, Y. Fu, Y. Liu, W. Zhu, Z. Liu, *Nat. Commun.*, 2018, **9**, 3457.

5 Y. Wang, W. Gao, S. Kazumi, H. Li, G. Yang, N. Tsubaki, *Chem. Eur. J.*, 2019, **25**, 5149-5153.

6 W. Gao, L. Guo, Y. Cui, G. Yang, Y. He, C. Zeng, A. Taguchi, T. Abe, Q. Ma, Y. Yoneyama, N. Tsubaki, *ChemSusChem*, 2020, **13**, 6541-6545.

- 7 C. Zhou, J. Shi, W. Zhou, K. Cheng, Q. Zhang, J. Kang, Y. Wang, *ACS Catal.*, 2020, **10**, 302-310.
- 8 G. Song, M. Li, P. Yan, M.A. Nawaz, D. Liu, *ACS Catal.*, 2020, **10**, 11268-11279.
- 9 A. Ramirez, A. Dutta Chowdhury, A. Dokania, P. Cnudde, M. Caglayan, I. Yarulina, E. Abou-Hamad, L. Gevers, S. Ould-Chikh, K. De Wispelaere, V. van Speybroeck, J. Gascon, *ACS Catal.*, 2019, **9**, 6320-6334.
- 10 X. Cui, P. Gao, S. Li, C. Yang, Z. Liu, H. Wang, L. Zhong, Y. Sun, *ACS Catal.*, 2019, **9**, 3866-3876.
- 11 J. Wei, R. Yao, Q. Ge, D. Xu, C. Fang, J. Zhang, H. Xu, J. Sun, *Appl. Catal. B-Environ.*, 2021, **283**, 119648.
- 12 M.G. Sibi, M.K. Khan, D. Verma, W. Yoon, J. Kim, *Appl. Catal. B-Environ.*, 2022, **301**, 120813.
- 13 Y. Wang, S. Kazumi, W. Gao, X. Gao, H. Li, X. Guo, Y. Yoneyama, G. Yang, N. Tsubaki, *Appl. Catal. B-Environ.*, 2020, **269**, 118792.
- 14 S. Wang, T. Wu, J. Lin, J. Tian, Y. Ji, Y. Pei, S. Yan, M. Qiao, H. Xu, B. Zong, *ACS Sustain. Chem. Eng.*, 2019, **7**, 17825-17833.

**Table S2** The element composition of fresh CuFeO<sub>2</sub> and Si/Al of different HZSM-5

| Sample                   | Si/Al mol ratio <sup>a</sup> | Cu (mass%) <sup>b</sup> | Fe (mass%) | Na (mass%)     |
|--------------------------|------------------------------|-------------------------|------------|----------------|
| Fresh CuFeO <sub>2</sub> |                              | 52.8                    | 47.2       | - <sup>c</sup> |
| HZSM-5(12.5)             | 15.7                         |                         |            |                |
| HZSM-5(25)               | 25.4                         |                         |            |                |
| HZSM-5(65)               | 66.1                         |                         |            |                |
| HZSM-5(150)              | 152.8                        |                         |            |                |
| 0.15M-HZSM-5(25)         | 24.0                         |                         |            |                |
| 0.3M-HZSM-5(25)          | 23.5                         |                         |            |                |
| 0.15M-HZSM-5(25)@S-1     | 72.2                         |                         |            |                |

<sup>a</sup>Determined by XRF

<sup>b</sup>Determined by ICP

<sup>c</sup>Not detected

**Table S3** Catalytic performances of Fe<sub>2</sub>O<sub>3</sub>, CuFeO<sub>2</sub> and bifunctional catalysts<sup>a</sup>

| Catalyst                       | CO <sub>2</sub> | CO       | Hydrocarbon distribution (%) |                               |                               |                                            | o/p <sup>d</sup> |           |
|--------------------------------|-----------------|----------|------------------------------|-------------------------------|-------------------------------|--------------------------------------------|------------------|-----------|
|                                | Conv. (%)       | Sel. (%) | CH <sub>4</sub>              | C <sub>2-4</sub> <sup>o</sup> | C <sub>2-4</sub> <sup>=</sup> | <sup>b</sup> N-C <sub>5</sub> <sup>+</sup> |                  | Aromatics |
| Fe <sub>2</sub> O <sub>3</sub> | 19.6            | 18.8     | 28.7                         | 17.2                          | 9.6                           | 44.5                                       | - <sup>c</sup>   | 0.36      |
| CuFeO <sub>2</sub>             | 49.7            | 7.9      | 7.2                          | 2.5                           | 13.4                          | 76.9                                       | - <sup>c</sup>   | 4.77      |
| HZSM-5(150) <sup>e</sup>       | 45.4            | 9.1      | 8.7                          | 6.1                           | 11.7                          | 37.8                                       | 35.7             | 2.18      |
| HZSM-5(65) <sup>e</sup>        | 47.9            | 8.3      | 8.6                          | 8.6                           | 4.8                           | 31.7                                       | 46.3             | 0.61      |
| HZSM-5(25) <sup>e</sup>        | 46.1            | 8.6      | 8.0                          | 14.1                          | 1.6                           | 20.0                                       | 56.3             | 0.15      |
| HZSM-5(12.5) <sup>e</sup>      | 45.0            | 8.7      | 10.2                         | 17.7                          | 1.7                           | 23.4                                       | 47.0             | 0.11      |

<sup>a</sup>Reaction conditions: 320 °C, 3 MPa, H<sub>2</sub>/CO<sub>2</sub> = 3, GHSV = 8100 mL·gcat<sup>-1</sup>·h<sup>-1</sup>.

<sup>b</sup>C<sub>5</sub><sup>+</sup> hydrocarbon excluded aromatics.

<sup>c</sup>Not detected.

<sup>d</sup>The ratio of olefins/alkane for C<sub>2-4</sub>.

<sup>e</sup>Represented CuFeO<sub>2</sub> coupled with different HZSM-5.



**Table S4** The Mössbauer parameters of the spent CuFeO<sub>2</sub>

| Catalyst                 | IS (mm/s) | QS (mm/s) | Area (%) | Assignment                         |
|--------------------------|-----------|-----------|----------|------------------------------------|
| Spent CuFeO <sub>2</sub> | 0.40      | -0.02     | 23.39    | Fe <sub>3</sub> O <sub>4</sub> (A) |
|                          | 0.70      | -0.67     | 13.14    | Fe <sub>3</sub> O <sub>4</sub> (B) |
|                          | 0.38      | 0.11      | 12.20    | Fe <sub>5</sub> C <sub>2</sub> (A) |
|                          | 0.32      | 0.02      | 26.19    | Fe <sub>5</sub> C <sub>2</sub> (B) |
|                          | 0.38      | -0.02     | 13.15    | Fe <sub>5</sub> C <sub>2</sub> (C) |
|                          | 0.40      | 0.18      | 8.06     | Fe <sub>3</sub> C (A)              |
|                          | 0.30      | -0.04     | 3.86     | Fe <sub>3</sub> C (B)              |

**Table S5** Catalytic performances of different CuFeO<sub>2</sub>/HZSM-5(25) catalysts<sup>a</sup>

| Catalyst                          | CO <sub>2</sub> |                  | CO<br>Sel.<br>(%) | Hydrocarbon distribution (%) |                                          |                                          |                                            |           | o/p <sup>d</sup> |
|-----------------------------------|-----------------|------------------|-------------------|------------------------------|------------------------------------------|------------------------------------------|--------------------------------------------|-----------|------------------|
|                                   | Conv.<br>(%)    | FTY <sup>b</sup> |                   | CH <sub>4</sub>              | C <sub>2-</sub> <sub>4<sup>o</sup></sub> | C <sub>2-</sub> <sub>4<sup>=</sup></sub> | <sup>c</sup> N-C <sub>5</sub> <sup>+</sup> | Aromatics |                  |
| HZSM-5(25) <sup>e</sup>           | 46.1            | 3.1              | 8.6               | 8.0                          | 14.1                                     | 1.6                                      | 20.0                                       | 56.3      | 0.15             |
| 0.15M-HZSM-5(25) <sup>e</sup>     | 52.8            | 3.6              | 7.3               | 4.1                          | 12.5                                     | 1.6                                      | 13.4                                       | 69.7      | 0.16             |
| 0.3M-HZSM-5(25) <sup>e</sup>      | 40.9            | 2.8              | 10.2              | 4.2                          | 7.3                                      | 4.7                                      | 12.7                                       | 71.9      | 0.58             |
| 0.15M-HZSM-5(25)@S-1 <sup>e</sup> | 45.2            | 3.1              | 11.7              | 6.2                          | 9.4                                      | 10.3                                     | 19.7                                       | 54.4      | 1.04             |

<sup>a</sup>Reaction condition: 320 °C, 3 MPa, H<sub>2</sub>/CO<sub>2</sub> = 3, GHSV = 8100 mL·gcat<sup>-1</sup>·h<sup>-1</sup>.

<sup>b</sup>(FTY 10<sup>-5</sup> mol of CO<sub>2</sub> converted per g of Fe in the catalyst per second)

<sup>c</sup>C<sub>5</sub><sup>+</sup> hydrocarbon excluded aromatics.

<sup>d</sup>The ratio of olefins/alkane for C<sub>2-4</sub>.

<sup>e</sup>Represented CuFeO<sub>2</sub> coupled with different HZSM-5.
